# Supplementary material for: Histological Study of Suprabranchial Chamber Membranes in Anabantoidei and Clariidae Fishes
Source: MDPI journal article supplement (doi:10.3390/ani11041158), 2021-04-17
Supplement: s1 [file s1]

### Supplementary data 1:

#### Hematoxylin & eosin staining protocol:

1. Deparaffinized and rehydrated slides were incubated for 10 minutes in Ehrlich's hematoxylin<sup>i</sup>.
2. Differentiation was conducted in acidic alcohol (0.5% HCl in 70% EtOH).
3. Slides were washed in tap water (pH 8.4) for 5 minutes.
4. Counterstaining in aqueous 0.5% eosin solution for 5 minutes.
5. Differentiation in 70% ethanol for 10 seconds.
6. Dehydration, clearing (with xylene) and mounting (with DPX).

#### AB/PAS staining protocol:

1. Deparaffinized and rehydrated slides were washed in deionized water.
2. Staining in 1% (pH 2.5) Alcian blue for 10 minutes.
3. Slides were washed in tap water for 5 minutes and then rinsed in deionized water.
4. Incubation in 0.5% periodic acid for 5 minutes.
5. Washing in deionized water was repeated 3 times, for 1 minute each.
6. Staining in Schiff's solution (Sigma Aldrich) for 15 minutes in 4°C.
7. Slides were washed in tap water for 5 minutes.
8. Counterstaining with Harris' hematoxylin<sup>ii</sup> for 2 minutes.
9. Differentiation in acidic alcohol (0.5% HCl in 70% EtOH).
10. Dehydration, clearing (with xylene) and mounting (with DPX).

#### Mallory's trichrome staining protocol:

1. Deparaffinized and rehydrated slides were washed in deionized water.
2. Staining in aqueous 0.5% acidic fuchsin solution for 7 minutes.
3. Staining in Mallory's solution<sup>iii</sup> for 20 minutes.
4. Differentiation in 96% alcohol.
5. Quick dehydration, clearing (with xylene) and mounting (with DPX).

#### Modified AB/PAS combined with Mallory's staining protocol:

1. Staining in 1% (pH 2.5) Alcian blue for 10 minutes.
2. Slides were washed in tap water for 5 minutes and then rinsed in deionized water.
3. Incubation in 0.5% periodic acid for 5 minutes.
4. Washing in deionized water was repeated 3 times, for 1 minute each.
5. Staining in Schiff's solution for 15 minutes in 4°C.
6. Slides were washed in tap water for 5 minutes.
7. Counterstaining with iron hematoxylin<sup>iv</sup> for 2 minutes.
8. Differentiation in acidic alcohol (0.5% HCl in 70% EtOH).

9. Incubation in Mallory's solution for 10 minutes.
10. Differentiation in 96% alcohol.
11. Dehydration, clearing (with xylene) and mounting (with DPX).

---

<sup>i</sup> 1g hematoxylin was dissolved in 100ml of 99% ethanol. 100 ml of 3% ammonium alum was added and 100ml of glycerin. To acidify, 10 ml of glacial acetic acid was added. For oxidation, sodium iodate was added (0.01g).

<sup>ii</sup> Two solutions were mixed: 1% alcoholic hematoxylin with warmed saturated ammonium alum. For oxidation, mercuric oxide was added (0.25g). After cooling, 0.2 ml of glacial acetic acid was added.

<sup>iii</sup> 0.5g aniline blue was mixed with 2g of orange G and 1g of phosphotungstic acid in 100ml of deionized water.

<sup>iv</sup> 2% alcoholic hematoxylin was mixed with equal volume of 4% iron chloride before staining.
